# Supplementary material for: Synthesis and characterization of core–shell–shell magnetic (CoFe2O4–SiO2–TiO2) nanocomposites and TiO2nanoparticles for the evaluation of photocatalytic activity under UV and visible irradiation
Source: Royal Society of Chemistry journal article supplement (doi:10.1039/c4nj01821d), 2015-01-01
Supplement: c4nj01821d1.pdf [file c4nj01821d1.pdf]

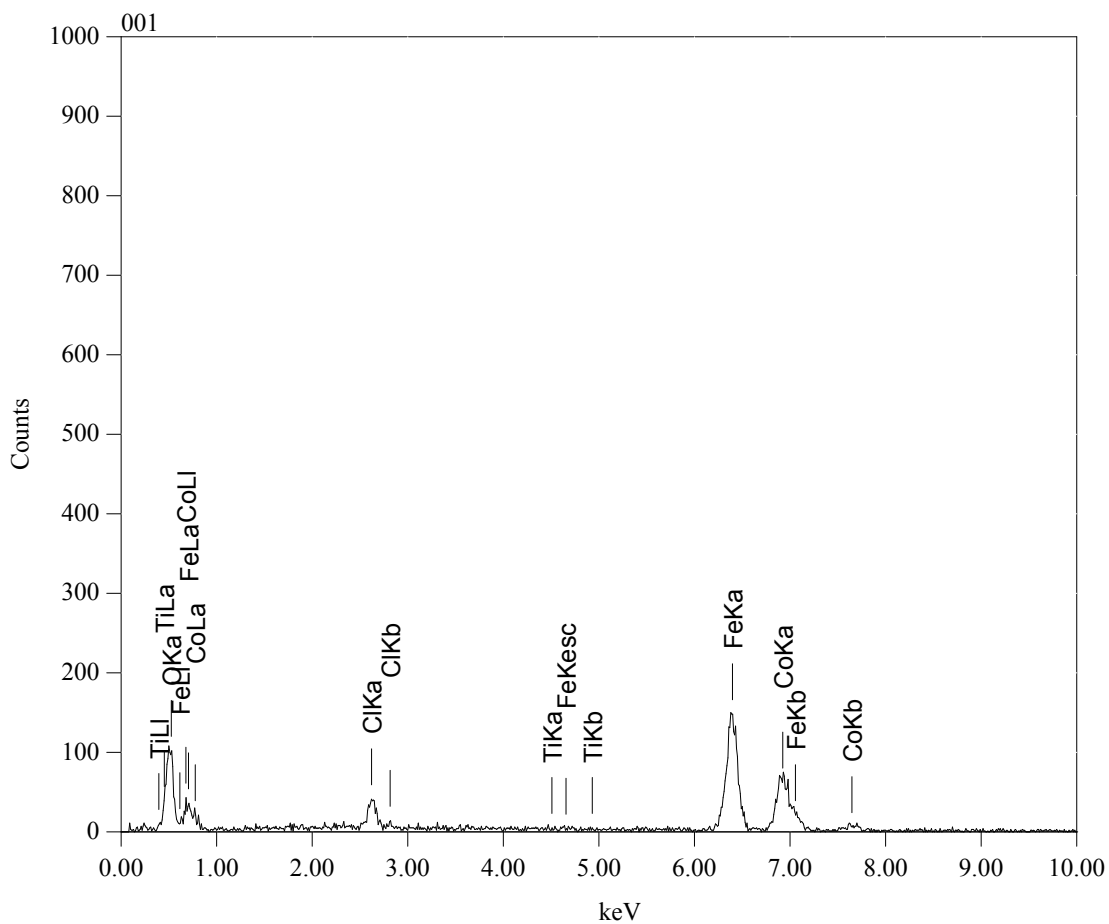

| Element | (keV) | mass%  | Error% | At%    | Compound | mass% | Cation K |
|---------|-------|--------|--------|--------|----------|-------|----------|
| O K     | 0.525 | 15.36  | 0.11   | 38.63  |          |       | 18.8430  |
| Cl K    | 2.621 | 3.63   | 0.10   | 4.12   |          |       | 3.4575   |
| Fe K    | 6.398 | 51.21  | 0.29   | 36.90  |          |       | 49.4681  |
| Co K    | 6.924 | 29.80  | 0.36   | 20.35  |          |       | 28.2314  |
| Total   |       | 100.00 |        | 100.00 |          |       |          |

( 1 C )

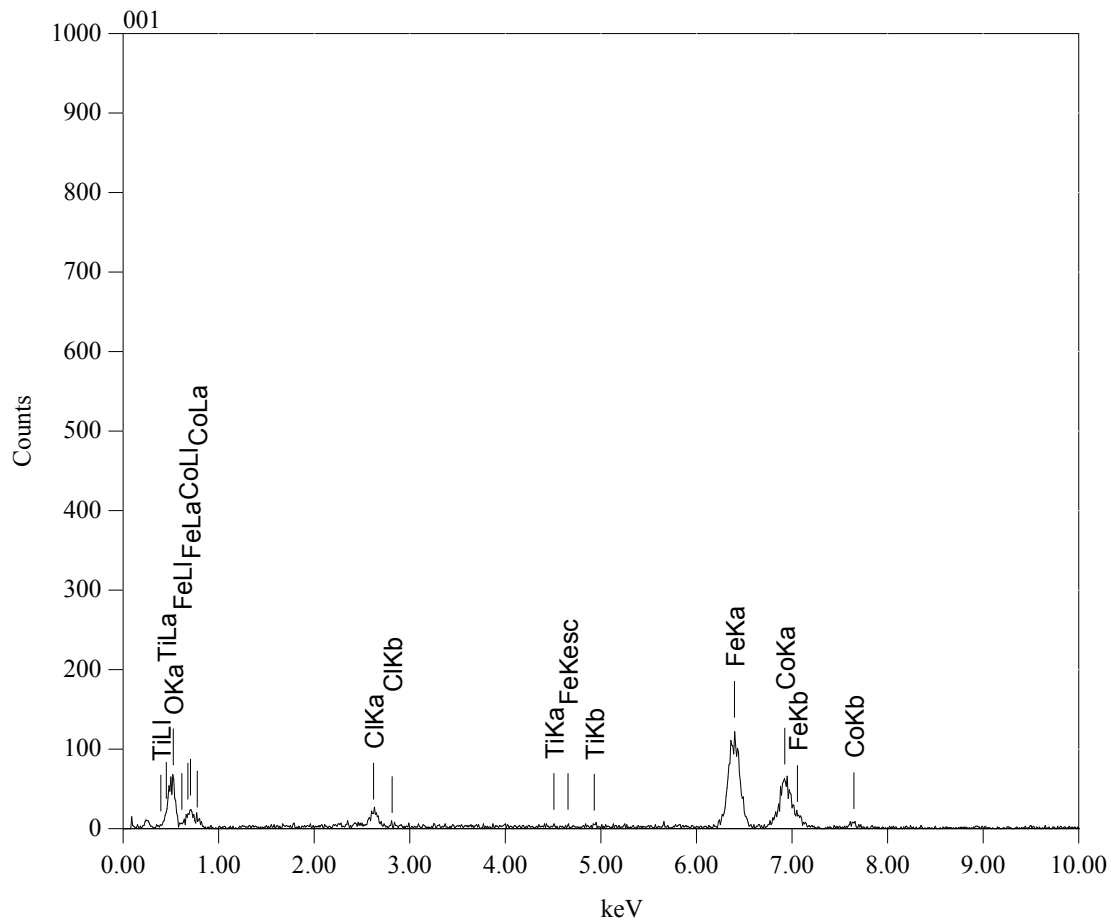

| Element(keV) | mass% | Error% | At%  | Compound | mass% | Cation K |
|--------------|-------|--------|------|----------|-------|----------|
| O K          | 0.525 | 11.94  | 0.10 | 32.16    |       | 14.8570  |
| Cl K         | 2.621 | 2.74   | 0.09 | 3.32     |       | 2.6026   |
| Fe K         | 6.398 | 52.49  | 0.27 | 40.50    |       | 51.1508  |
| Co K         | 6.924 | 32.84  | 0.33 | 24.01    |       | 31.3896  |
| Total        |       | 100.00 |      | 100.00   |       |          |

( 1 C- 1 )

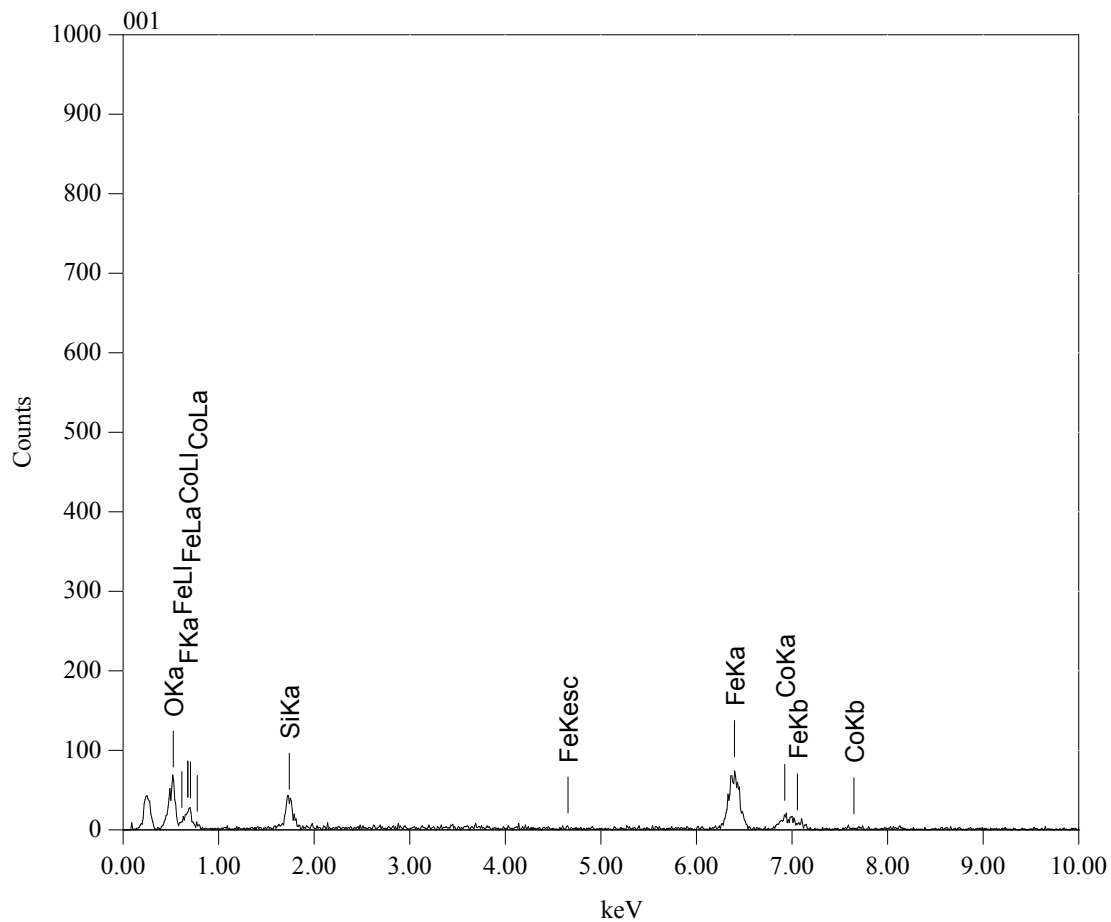

| Element | (keV) | mass%  | Error% | At%    | Compound | mass% | Cation K |
|---------|-------|--------|--------|--------|----------|-------|----------|
| O K     | 0.525 | 19.37  | 0.23   | 40.82  |          |       | 25.5354  |
| F K     | 0.677 | 4.64   | 0.30   | 8.23   |          |       | 1.9367   |
| Si K    | 1.739 | 9.19   | 0.28   | 11.03  |          |       | 5.7627   |
| Fe K    | 6.398 | 53.40  | 0.63   | 32.25  |          |       | 53.5811  |
| Co K    | 6.924 | 13.41  | 0.79   | 7.67   |          |       | 13.1842  |
| Total   |       | 100.00 |        | 100.00 |          |       |          |

( SC1 )

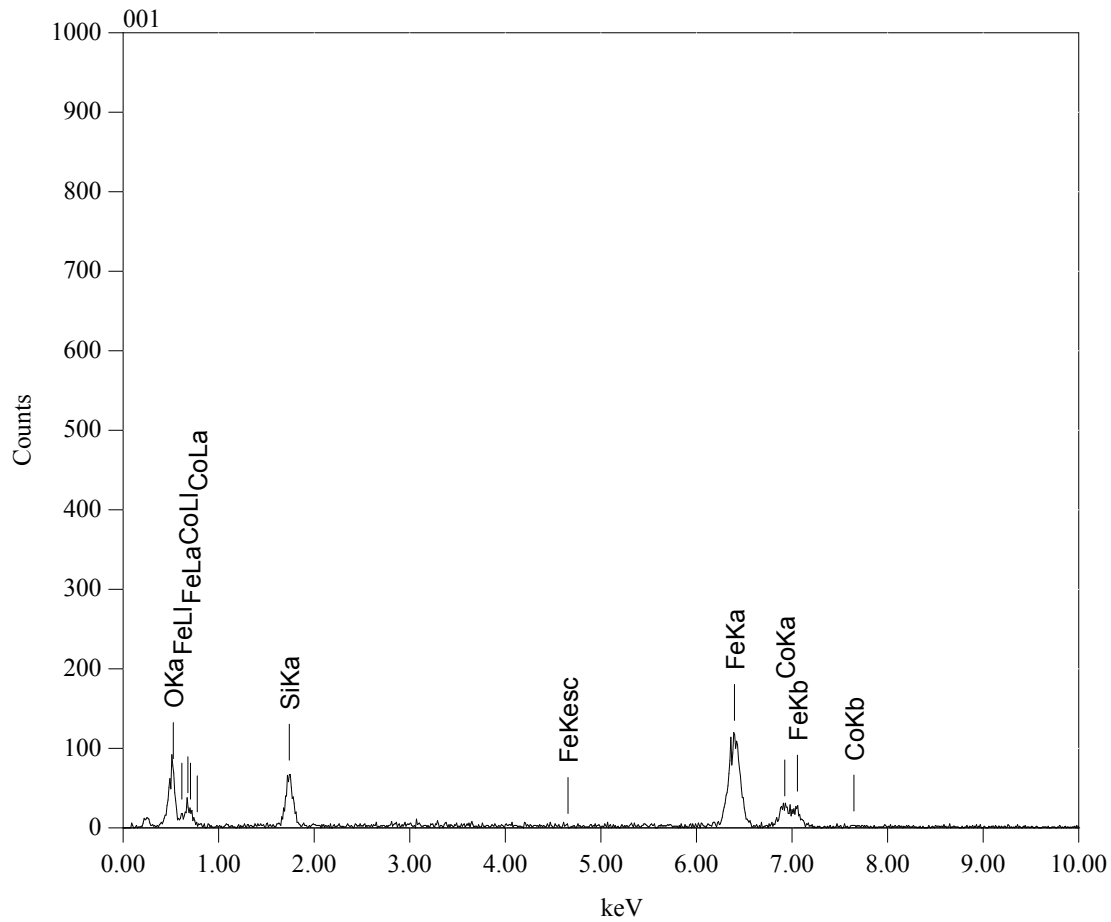

| Element | (keV) | mass%  | Error% | At%    | Compound | mass% | Cation K |
|---------|-------|--------|--------|--------|----------|-------|----------|
| O K     | 0.525 | 17.77  | 0.11   | 40.48  |          |       | 22.5117  |
| Si K    | 1.739 | 9.81   | 0.14   | 12.73  |          |       | 6.0043   |
| Fe K    | 6.398 | 58.44  | 0.30   | 38.15  |          |       | 57.9049  |
| Co K    | 6.924 | 13.98  | 0.38   | 8.65   |          |       | 13.5791  |
| Total   |       | 100.00 |        | 100.00 |          |       |          |

( SC1-1 )

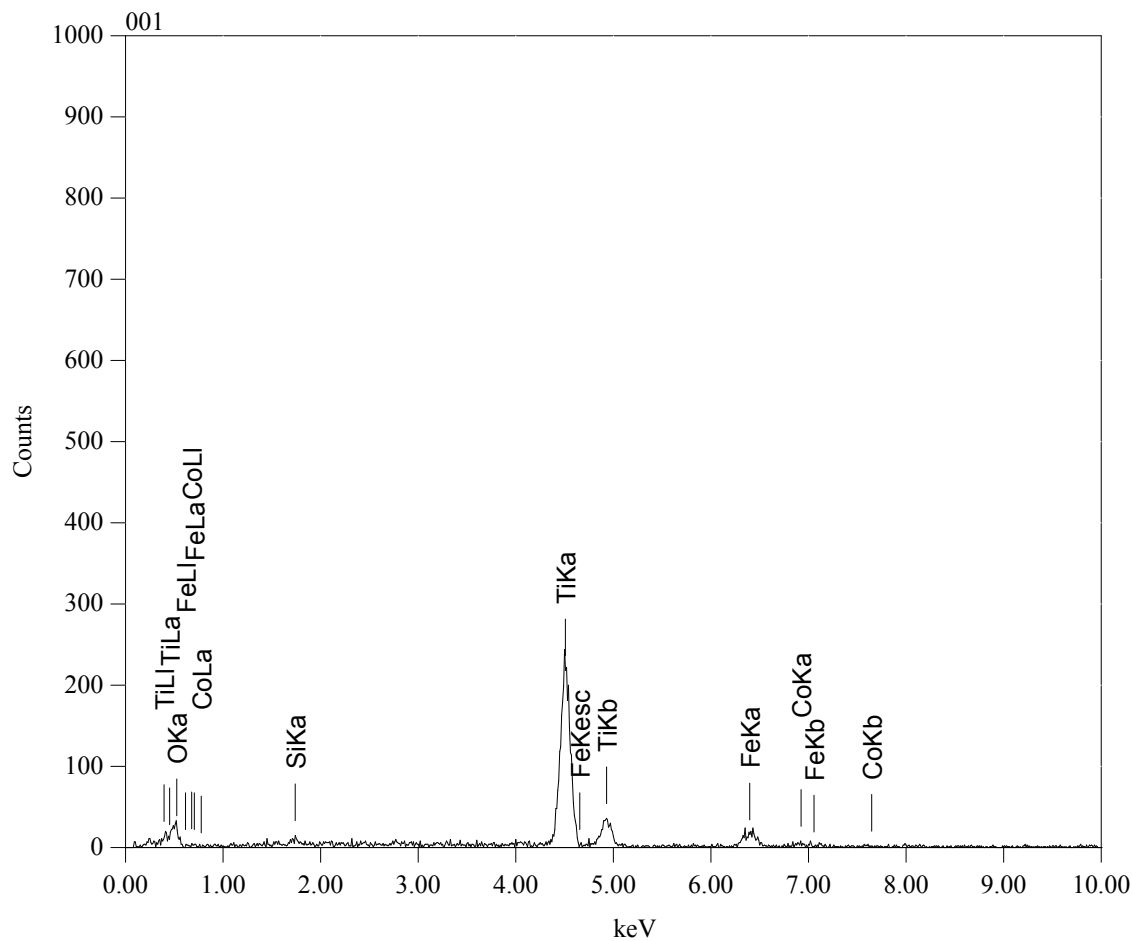

| Element | (keV) | mass%  | Error% | At%    | Compound | mass% | Cation K |
|---------|-------|--------|--------|--------|----------|-------|----------|
| O K     | 0.525 | 29.30  | 0.58   | 55.70  |          |       | 10.2406  |
| Si K    | 1.739 | 1.02   | 0.10   | 1.10   |          |       | 0.9609   |
| Ti K    | 4.508 | 58.80  | 0.15   | 37.33  |          |       | 76.0844  |
| Fe K    | 6.398 | 8.73   | 0.30   | 4.76   |          |       | 10.2202  |
| Co K    | 6.924 | 2.14   | 0.36   | 1.10   |          |       | 2.4939   |
| Total   |       | 100.00 |        | 100.00 |          |       |          |

( TSC )

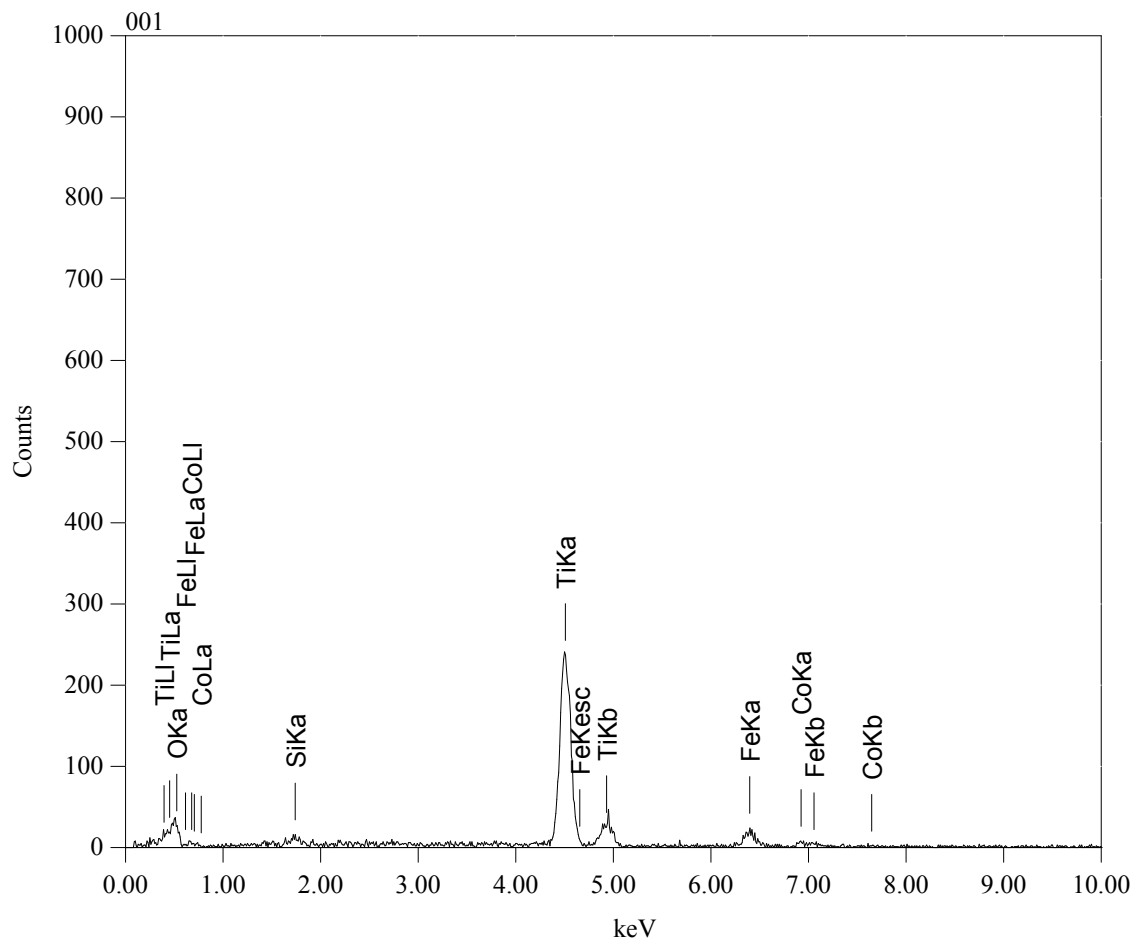

| Element | (keV) | mass%  | Error% | At%    | Compound | mass% | Cation K |
|---------|-------|--------|--------|--------|----------|-------|----------|
| O K     | 0.525 | 29.74  | 0.65   | 56.35  |          |       | 10.6733  |
| Si K    | 1.739 | 0.78   | 0.12   | 0.85   |          |       | 0.7360   |
| Ti K    | 4.508 | 57.50  | 0.17   | 36.39  |          |       | 74.5394  |
| Fe K    | 6.398 | 8.97   | 0.34   | 4.87   |          |       | 10.5307  |
| Co K    | 6.924 | 3.01   | 0.42   | 1.55   |          |       | 3.5207   |
| Total   |       | 100.00 |        | 100.00 |          |       |          |

( TSC-1 )

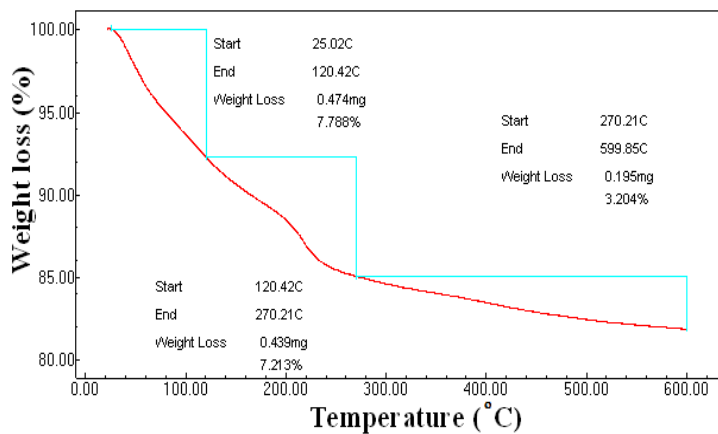

(a)

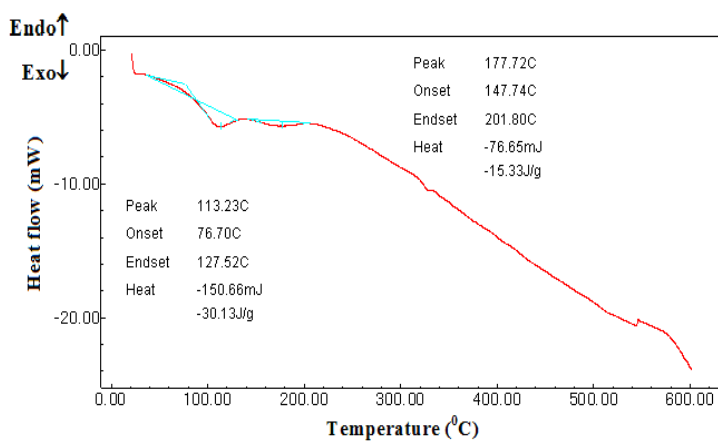

(b)

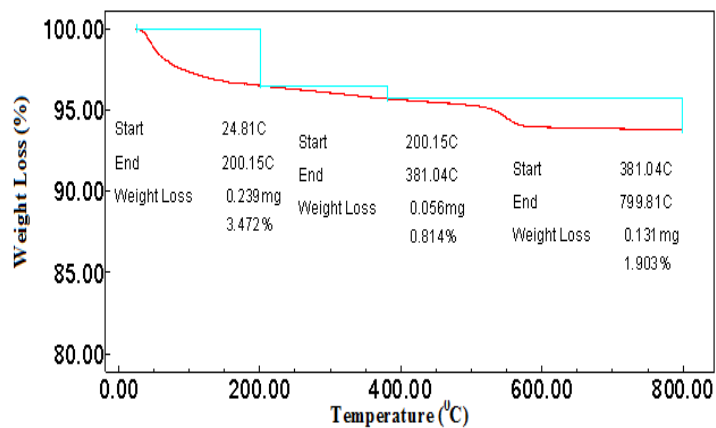

(c)

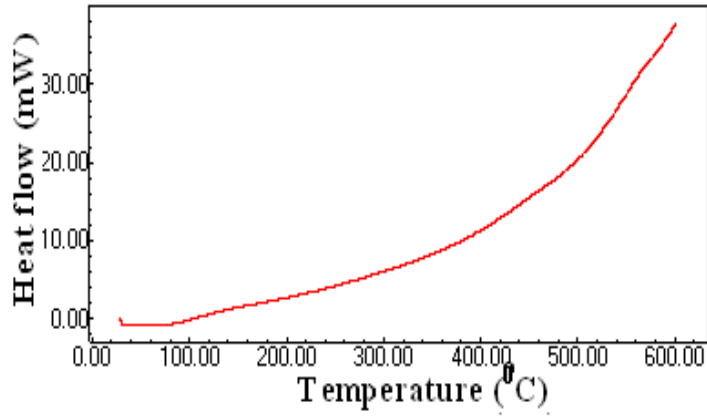

(d)

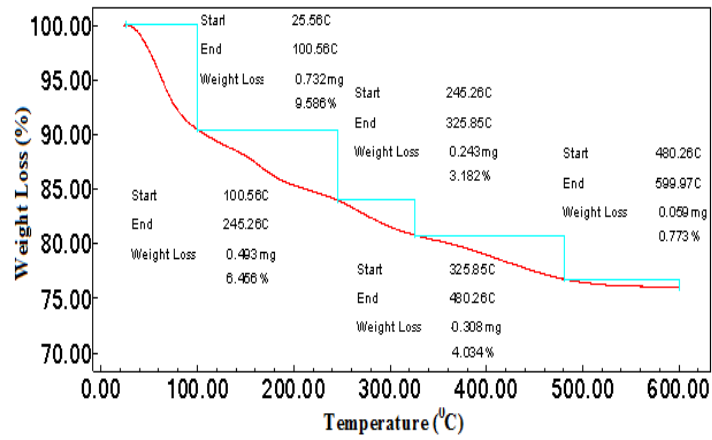

(e)

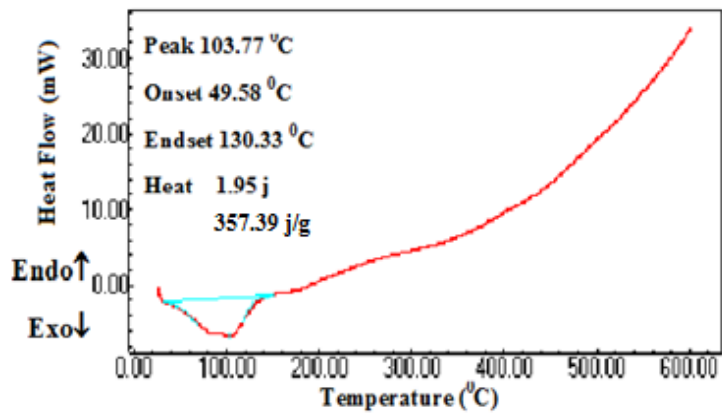

(f)



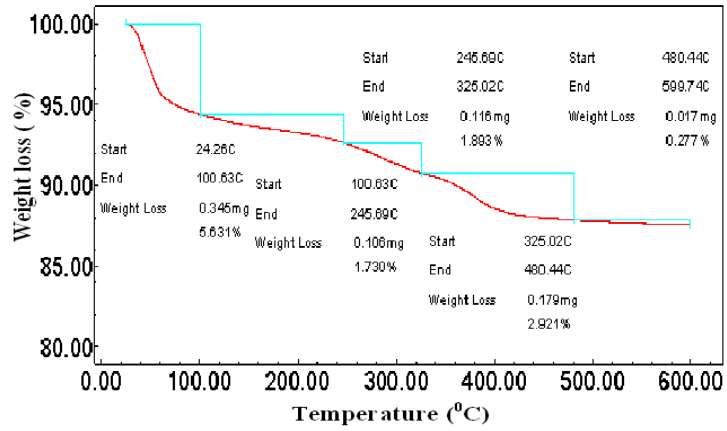

(g)

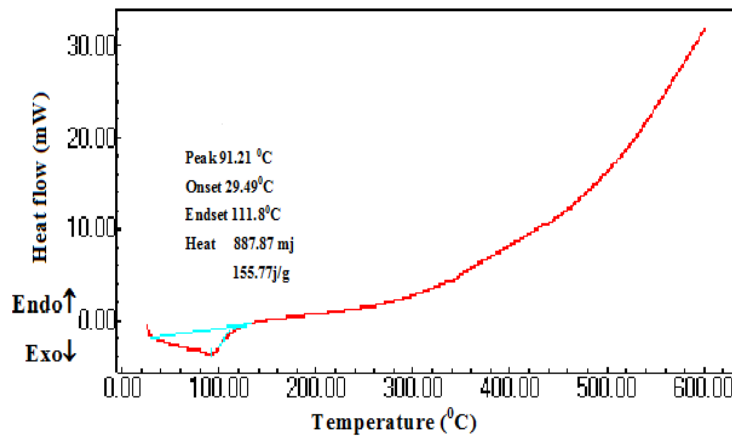

(h)

Figure: TGA for a) as prepared  $\text{CoFe}_2\text{O}_4$ , c) SC , e)TSC and g) 4C and DSC for b) as prepared  $\text{CoFe}_2\text{O}_4$ , d) SC , f)TSC and h) 4C.
